1 **Anatomical diversification of a skeletal novelty in bat feet**

2 Kathryn E. Stanchak<sup>1\*</sup>, Jessica H. Arbour<sup>1</sup>, Sharlene E. Santana<sup>1</sup>

3 <sup>1</sup>Department of Biology and Burke Museum of Natural History and Culture, University of  
4 Washington, Seattle, Washington 98195, USA

5 \*Correspondence to: Katie Stanchak, Department of Biology, University of Washington, Box  
6 351800, Seattle, WA 98195. E-mail: [stanchak@uw.edu](mailto:stanchak@uw.edu)

7

8 **Running Title:** Diversification of the bat calcar

9

10 **Author Contributions:** KES and SES conceived of the project. KES collected and analyzed  
11 data. KES, JHA, and SES interpreted the data analysis and wrote the paper.

12

13 **Acknowledgements:** We thank the Division of Mammals at the Smithsonian National Museum  
14 of Natural History, the Department of Mammalogy at the American Museum of Natural History,  
15 the Mammal Collection at the Museum of Vertebrate Zoology, the Slater Museum of Natural  
16 History, the Mammal Collection at the Field Museum of Natural History, the Herring Lab at the  
17 University of Washington, and the Lubee Bat Conservancy for providing access to specimens. L.  
18 Leiser-Miller collected many specimens in the Santana Lab collection. O. Okoloko helped with  
19 CT scans. L. Zeman, E. Johnson, and members of the Herring Lab advised on histological  
20 technique, and A.P. Summers provided use of the  $\mu$ CT scanner at Friday Harbor Laboratories.  
21 The project benefited from discussion with participants of the 2015 and 2018 Annual Meetings  
22 of the North American Society for Bat Research. A.A. Curtis, Z.A. Kaliszewska, R.M. Kelly,  
23 and L. Leiser-Miller provided advice on several manuscript drafts. KES was funded by a

24 National Science Foundation (NSF) Doctoral Dissertation Improvement Grant (#1700845), a  
25 Theodore Roosevelt Memorial Grant from the American Museum of Natural History, a Grant-in-  
26 Aid of Research from the American Society of Mammalogists, the Iuvo Award from the  
27 University of Washington Department of Biology, and funds from the Department of  
28 Mammalogy at the Burke Museum of Natural History and Culture. SES and JHA were funded by  
29 NSF Grant #1557125.

30

31 **Data Accessibility Statement:** CT scans will be uploaded to Morphosource upon acceptance  
32 and available at time of publication. Data sets will be provided as Supporting Information  
33 associated with the publication.

34

35

36

37

38

39

40

41

42

43

44

45

46

47 **Anatomical diversification of a skeletal novelty in bat feet**

48 **ABSTRACT**

49 Neomorphic, membrane-associated skeletal rods are found in disparate vertebrate  
50 lineages, but their evolution is poorly understood. Here we show that one of these elements—the  
51 calcar of bats (Chiroptera)—is a skeletal novelty that has anatomically diversified. Our  
52 comparisons of evolutionary models of calcar length and corresponding disparity-through-time  
53 analyses indicate that the calcar diversified early in the evolutionary history of Chiroptera, as  
54 bats systematically radiated after evolving the capacity for flight. We find interspecific variation  
55 in a variety of anatomical parameters of probable importance for calcar function, which suggests  
56 that adaptive advantages provided by the calcar led to its anatomical diversification. In addition  
57 to overall length, we find that the calcar varies among bats in its tissue composition, and a  
58 synovial joint is present at the articulation between the calcar and the calcaneus ankle bone in  
59 some species. This suggests the calcar has a kinematic functional role. Our results demonstrate  
60 that novel skeletal additions can become integrated into vertebrate body plans and subsequently  
61 evolve into a variety of forms, potentially impacting clade diversification by expanding the  
62 available morphological space into which organisms can evolve.

63

64 **Keywords:** evolutionary novelty; neomorphism; Chiroptera; morphology; early burst

65

66

67

68

69

## 70 INTRODUCTION

71 Enigmatic, neomorphic anatomical elements are scattered throughout the paleontological  
72 and neontological records of vertebrate evolution (Hall 2015). Recent fossil discoveries have  
73 raised interest in one specific type of novel skeletal structure: the “styliform” elements of  
74 vertebrates that use membranes to glide or fly (Fig. 1). This group of skeletal elements comprises  
75 the calcar of bats (Schutt and Simmons 1998), the styliform cartilages of gliding rodents and one  
76 marsupial (Coster et al. 2015, Kawashima et al. 2017, Johnson-Murray 1987, Jackson 2012), the  
77 pteroid of pterosaurs (Bennett 2007), and was recently expanded to include the styliform element  
78 of *Yi qi*, a maniraptoran theropod dinosaur (Xu et al. 2015) and the calcar of *Maiopatagium*  
79 *furculiferum*, a haramiyid mammaliaform (Meng et al. 2017). Since these skeletal rods are now  
80 known from disparate tetrapod lineages, they seem less like evolutionary oddities than  
81 consequential skeletal novelties characteristic of membranous body plans. The literature on most  
82 of these structures is limited to osteological descriptions, so much is still unknown about their  
83 function, origin, and diversification. The pterosaur pteroid has been the focus of several studies  
84 and has generated debates on its anatomy and function (summarized in Witton 2013), but  
85 although the Pterosauria comprises a taxonomically diverse clade in which to explore pteroid  
86 variation, the lack of extant successors in the lineage restricts detailed anatomical and functional  
87 studies. In contrast, another of these neomorphic styliform elements—the bat calcar—is  
88 widespread across extant bats, making it an ideal model system for gaining a better  
89 understanding of the evolution of membrane-bound skeletal rods, and more generally, the  
90 evolution of neomorphic skeletal elements.

91 Bats (Chiroptera) are systematically, morphologically, and ecologically diverse  
92 (Simmons 2005, Fenton and Simmons 2015, Kunz and Fenton 2005). The calcar articulates with

93 the calcaneus bone in the bat ankle and extends into the membrane that spans between the two  
94 hindlimbs (Vaughan 1970; Fig. 1). The calcar abruptly appears in the early bat fossil record  
95 (*Onychonycteris finneyi*, Onychonycteridae, Green River Formation, WY, USA; ~52.5 Ma;  
96 Simmons et al. 2008) and, based on its ubiquity among extant bats, seems to have become fixed  
97 as part of the bat wing structure. It is typically described as a bony or cartilaginous element,  
98 although histological studies to date have confirmed only the presence of cartilaginous tissue  
99 with varying levels of mineralization (Schutt and Simmons 1998, Adams and Thibault 1999,  
100 Czech et al. 2008, Stanchak and Santana 2018). Because bats are morphologically diverse and  
101 cartilage can be a precursor of bone, it has been hypothesized that the calcars of some bat species  
102 might be composed of bony tissue (Adams and Thibault 1999).

103         The calcars of the Old World fruit bats (Pteropodidae) are known to be different from  
104 those of the other bats. Pteropodid calcars are described as inserting on the tendon of the  
105 gastrocnemius muscle rather than articulating with the calcaneus and are consequently  
106 hypothesized not to be homologous to the calcars of other bats (Schutt and Simmons 1998,  
107 Kobayashi 2017). In previous phylogenetic hypotheses, Pteropodidae was considered the sister  
108 clade to all of the other bat families, which were collectively referred to as the  
109 “microchiroptera.” However, after the phylogeny of Chiroptera was revised using molecular  
110 data, non-pteropodid bats were rendered paraphyletic (Teeling et al. 2005). As a consequence,  
111 the hypothesis of a lack of homology between the pteropodid calcar and that of the “microbats”  
112 became a less-parsimonious explanation than that of a homologous calcar across Chiroptera.

113         In all animal clades with styliform elements, including bats, the evolution of membrane-  
114 bound limbs and a new locomotor mode (flight or gliding) allowed entry into new ecological  
115 space: the aerosphere. The bat fossil record demonstrates early taxonomic diversification coupled

116 with a rapid expansion of their geographic distribution (Smith et al. 2012). The earliest known  
117 bats, onychonycterids, have been found on both the North American and Eurasian Eocene land  
118 masses (Hand et al. 2015). By the end of the Eocene, bats are known from six continental  
119 landmasses (Smith et al. 2012, Hand et al. 2015). *Onychonycteris.finneyi*, which possessed the  
120 earliest known calcar, also had the most transitional bat postcranial skeleton found to-date, with  
121 limb proportions between those of bats and non-volant mammals (Simmons et al. 2008). Based  
122 on its presence in the oldest bat fossils, the calcar may be part of the suite of adaptations that  
123 allowed bats to functionally and ecologically radiate into varied niches after their initial invasion  
124 of the aerosphere. If so, we predict that (1) bat calcars will be morphologically diverse in trait  
125 parameters that theoretically affect function, and (2) calcar morphological diversification will  
126 reflect the rapid early diversification of Chiroptera, as suggested by the fossil record.

127         In this paper, we assess and describe the anatomical diversification of the calcar across  
128 the radiation of bats to test the predictions outlined above. We integrate a variety of methods to  
129 analyze calcar anatomy across a broad sample of bat species spanning diverse ecologies. First,  
130 we examine the variation in length of the calcar across Chiroptera and test different models of  
131 calcar evolution to reveal the macroevolutionary patterns and potential underlying processes that  
132 characterize calcar diversification. Then, we more closely investigate the anatomical diversity of  
133 the calcar with micro-Computed Tomography ( $\mu$ CT) scans to assess its status as a novel skeletal  
134 addition rather than another type of skeletal modification (e.g., a repeated tarsal element), and we  
135 integrate data from both  $\mu$ CT scans and histological sections to test the hypothesis that the calcar  
136 has histologically diversified. Finally, we combine gross dissections and diffusible iodine-based  
137 contrast-enhanced  $\mu$ CT (diceCT; Gignac et al. 2016) for the visualization of soft tissue to re-

138 evaluate the hypothesis that the pteropodid calcar is not homologous to the calcar of other bats.  
139 Collectively, these studies rigorously assess the scope and scale of bat calcar evolution.

140

## 141 **MATERIAL AND METHODS**

### 142 *Calcar Length Measurements and Macroevolutionary Analyses*

143 The length of a rod or shaft is one parameter that determines its ability to resist bending  
144 under an applied load (Hibbeler 2007). Bat calcars generally take a rod-shaped form, so  
145 comparisons of calcar length are informative about the potential functional importance of the  
146 calcar across bats. A single observer (KES) made caliper measurements of calcar, tibia, and  
147 forearm (i.e., radius) lengths of 1-9 fluid-preserved specimens representing 226 species and all  
148 recognized families within Chiroptera. In total, the sample included 1,396 specimens with an  
149 average of 6 specimens per species. A list of museum specimens is provided as a spreadsheet in  
150 the Supporting Information. By measuring intact, fluid-preserved specimens, we ensured that any  
151 thin, cartilaginous portions of the calcar were present and measured. We rounded caliper  
152 measurements to the nearest 1mm to reflect imprecision in measuring skeletal features from  
153 external examination of intact specimens. Because we based all measurements on external  
154 examination of specimens, it is possible that a very small, not externally evident calcar resulted  
155 in assigning a value of zero calcar length to some individuals (e.g., see Results regarding  
156 *Rhinopoma hardwickii*). We did not include fossil bat species in our sample because few  
157 postcrania are present in the bat fossil record and some extant calcars are unmineralized, so we  
158 would not be able to confirm the absence of a calcar for any bat fossil species.

159 For each specimen, we calculated the ratio of the calcar length divided by either the tibia  
160 or the forearm length and then averaged these ratios across all specimens for a particular species

161 to derive a unitless measure of hindlimb skeletal proportions to compare across species. We  
162 visualized the calcar-to-tibia length ratio character states on a pruned version of a relatively  
163 recent chiropteran phylogeny (Shi and Rabosky 2015) using the “fastAnc” method of the  
164 “contMap” function (Felsenstein 1985, Revell 2013) from the *phytools* v.0.6 package (Revell  
165 2012) in R v.3.4.3 (R Core Team 2017; all analyses were performed in the same version of R).  
166 We also calculated the residuals of phylogenetic generalized least squares regressions (pgls) of  
167 mean calcar length on mean tibia or mean forearm length assuming a Brownian motion  
168 correlation structure using the “phyl.resid” function (Revell 2009, Revell 2010) from the  
169 *phytools* v.0.6 R package (Revell 2012). While the calcar-to-tibia length ratio is more intuitively  
170 relevant to calcar biomechanics and function—even beyond its use for size normalization—we  
171 used both the tibia and forearm ratios and pgls residuals in subsequent evolutionary analyses so  
172 that we could better interpret the effect of variable transformations on our model fits. In addition,  
173 we repeated all of the following analyses for datasets that did not include the species for which  
174 we measured zero calcar length, and from which we excluded the Pteropodidae due to their  
175 differing calcar anatomy. All data used in analyses are provided as a spreadsheet in the  
176 Supporting Information.

177 To gain insight on the evolutionary processes that may have led to extant calcar diversity,  
178 we fit three models of evolution (Brownian motion, early burst, and single-peak Ornstein-  
179 Uhlenbeck) to the calcar length ratios and pgls residuals using the “fitContinuous” function in  
180 the *geiger* v.2.0.6 R package (Harmon et al. 2007, Pennell et al. 2014). Brownian motion (BM)  
181 models a “random-walk” process in which the variance of a trait increases linearly through time  
182 (as defined in evolutionary modeling by the evolutionary rate parameter  $\sigma^2$ ). It is often used to  
183 test the hypothesis of trait evolution under a drift or other random process (Felsenstein 1973).



184 The early burst (EB) model is used to test a niche-filling hypothesis consistent with an adaptive  
185 radiation; the rate at which a trait diversifies decreases with declining ecological opportunity  
186 after an initial, rapid “early burst” of diversification (Blomberg et al. 2003, Harmon et al. 2010).  
187 The EB model is parameterized by the initial evolutionary rate ( $\sigma^2$ ) and a parameter for the  
188 exponential change in evolutionary rates through time ( $a$ ), such that when  $a = 0$  the EB model  
189 reduces to the BM model and when  $a < 0$  evolutionary rates decrease as time progresses. An  
190 Ornstein-Uhlenbeck (OU) process is used to model an evolutionary process in which some  
191 restoring force (e.g., selection; parameterized by  $\alpha$ ) restrains a trait value ( $\theta$ ) through time  
192 (Hansen 1997, Butler and King 2004). As implemented here, the model assumes a single optimal  
193 trait value that is equal to the root ancestral state of the trait (parameterized by  $z_0$  in all models).  
194 We compared these three models using small sample size-corrected Akaike weights ( $w_{AICc}$ ). If  
195 the calcar underwent an early morphological diversification as the first bats systematically  
196 radiated, we expected to find the highest support for the EB model.

197 To visualize and quantify the tempo of calcar length evolution, we performed a disparity-  
198 through-time analysis using the “*dtm*” function (Harmon et al. 2003, Slater et al. 2010) from the  
199 *geiger* v.2.0.6 R package (Harmon et al. 2007, Pennell et al. 2014) to calculate the mean  
200 morphological disparity of each subtree in the pruned phylogeny using the average squared  
201 Euclidean distance among all pairs of points. We plotted this curve against a null distribution  
202 created by using the same procedure on a set of 1,000 simulations across the pruned phylogeny  
203 assuming a BM model of evolution of the relative calcar lengths. We used the morphological  
204 disparity index (MDI) to quantitatively compare subclade disparity in relative calcar length with  
205 the disparity expected under a BM model (Harmon et al. 2003, Slater et al. 2010). We  
206 determined the significance of the MDI by the frequency at which a calculated MDI between the

207 data set and each simulation trial was greater than zero. A negative MDI value indicates that  
208 disparity is partitioned more strongly among early divergence events, with more recent subclades  
209 each representing only a small portion of the total morphological diversity of the clade than  
210 expected under a constant-rate, random walk process (e.g., BM; Harmon et al. 2003, Slater et al.  
211 2010). Positive MDI values may be indicative of selective constraint or increasing evolutionary  
212 rates, where each recent subclade is more likely to represent a greater proportion of trait space  
213 (López-Fernández et al. 2013). A negative MDI supports a hypothesis of early, rapid  
214 morphological diversification prior to a period of relative stasis until the present day (Slater et al.  
215 2010). To more rigorously assess the prediction of early disparification, we also performed  
216 disparity-through-time analyses in which we compared the results from our data against  
217 simulated results generated under an EB model of evolution (Slater and Pennell 2014).

### 218 CT Scanning

219 To examine calcar anatomy in the context of other ankle and foot bones across bat  
220 species, we dissected and  $\mu$ CT scanned one foot of each of 19 fluid-preserved bat specimens  
221 representing 13 families within Chiroptera. We also  $\mu$ CT scanned three whole (non-dissected)  
222 fluid-preserved specimens representing three additional bat families (Appendix S1) for a total  
223 sample of 22 species representing 16 families. These specimens were sourced from museum  
224 collections, research collections in the Santana Lab and the Herring Lab at the University of  
225 Washington, and the Lubee Bat Conservancy. We segmented (digitally-dissected) the tarsals, the  
226 calcar, and other accessory ossicles in each  $\mu$ CT scan using Mimics v.19 (Materialise). The  
227 resulting 3D renderings allowed us to compare tarsal osteology across our samples in  
228 unprecedented detail.

229 Previous studies of pteropodid calcar anatomy describe a calcar that inserts on the tendon  
230 of the gastrocnemius muscle. This tendon then inserts on the calcaneal tuberosity. In contrast,  
231 calcars of the paraphyletic “microbats” articulate directly with the calcaneus. To better assess the  
232 soft tissue morphology of the calcars in Pteropodidae, we used diffusible-iodine contrast-  
233 enhanced  $\mu$ CT scanning (diceCT, Gignac et al. 2016) and conventional  $\mu$ CT scanning to image  
234 the feet of the three pteropodid species in our sample. For diceCT scanning, we placed each  
235 fluid-preserved specimen in a solution of Lugol’s iodine (3% total solute) for two to three days  
236 prior to CT scanning. The iodine solution increases the x-ray opacity of soft tissue—particularly  
237 muscle—in the sample, allowing for the visualization of this tissue in the  $\mu$ CT scan. Then, we  
238 dissected each of the pteropodid feet to further assess the connection between the calcar spur and  
239 the calcaneus ankle bone. A list of scanned specimens and  $\mu$ CT scanner settings is provided in  
240 Appendix S1.

#### 241 *Histology*

242 We used both the  $\mu$ CT scans and histological sections of the dissected specimens to  
243 compare calcar tissue composition across 18 bat species (Appendix S1). Calcified calcar samples  
244 were first decalcified in 14% EDTA aqueous solution neutralized with ammonium hydroxide.  
245 Because we had difficulty completely decalcifying some samples in EDTA, we transferred them  
246 to 5% aqueous formic acid for further decalcification. We then dehydrated, cleared, and  
247 embedded all samples in paraffin wax. We sectioned each paraffin block at 5-8 micrometers with  
248 a Leica RM2145 microtome, mounted the sections to slides, then cleared, rehydrated, and stained  
249 the sections using either modified Mayer’s hematoxylin and Mallory’s triple connective tissue  
250 stain (Humason 1962) or Weigert’s iron hematoxylin and fast green/safranin O. For all samples,  
251 we determined calcar tissue composition by cell and substrate morphology, not by stain color.

252 We imaged the sections with a Nikon Eclipse E600FN compound microscope and an AmScope  
253 MU300 camera.

254

## 255 **RESULTS**

256 The calcar exhibits extensive anatomical diversity across Chiroptera. Calcars range from  
257 not externally visible (a length of zero) to considerably longer than the tibia (Fig. 2). We found  
258 strong support ( $w_{AICc} > 0.99$ ) for the EB model of morphological evolution for calcar length  
259 relative to tibia length in all model comparisons that included pteropodid bats in the sample  
260 (Table 1). All OU models collapsed to BM models, so only model results for BM and EB models  
261 are shown. Support for the EB model decreased for the sample that did not include Pteropodidae.  
262 Disparity-through-time analyses supported early diversification of calcar length in all cases, as  
263 evidenced by significantly low MDI values when compared to a null BM distribution (Fig. 2,  
264 Table 2). MDI values consistently increased when the calcar length disparity-through-time curve  
265 was compared to a distribution generated under an EB model of evolution.

266 Detailed investigation of calcar anatomy with  $\mu$ CT scans revealed that bat ankles exhibit  
267 numerous tarsal modifications and collectively contain multiple accessory ossicles (Fig. 3;  
268 descriptions in Appendix S1). However, none of these osteological modifications refute the  
269 status of the calcar as a skeletal neomorphism or morphological novelty. In no bat species is the  
270 calcar contiguous with another tarsal, nor is the calcar an obviously repeated skeletal element.  
271 The calcar of any one bat species is only anatomically similar in both structure and location to  
272 calcars of other bats and not to another tarsal element.

273 Histological sections complemented the  $\mu$ CT scans in revealing tissue-level diversity in  
274 bat calcars. While calcars are predominantly composed of uncalcified or calcified cartilage, some

275 calcars contain ossified tissue (Fig. 4; Appendix S1). The calcar of *Noctilio leporinus*  
276 (Noctilionidae) is composed of thick cortical bone in the section proximal to the ankle, and both  
277  $\mu$ CT scans and histological sections demonstrated the formation of trabeculae (Fig. 4a, b, c). The  
278 type of connective tissue also varies within a single calcar, along a continuum of cartilage,  
279 calcified cartilage, and bone. The calcar of *Molossus molossus* (Molossidae) is bony proximally  
280 and cartilaginous distally; as the bone grades into cartilage, only the interior of the calcar shaft is  
281 bony, and this bony tissue is surrounded by a thick layer of tissue that appears more cartilage-  
282 like (Fig. 4d, e). This partially bony calcar contrasts with the typical cartilaginous calcar of the  
283 other species, as exemplified by the primarily calcified cartilage calcar of *Eptesicus fuscus* (Fig.  
284 4f). Both the *E. fuscus* and *M. molossus* calcars are surrounded by a thick, perichondrium-like  
285 envelope (Fig. 4e and 4f, respectively). *Pteronotus quadridens* (Mormoopidae) and *Macrotus*  
286 *waterhousii* (Phyllostomidae) also have bony proximal ends of their calcars, but the degree to  
287 which this ossification extends distally varies between the two species (Appendix S1). The short  
288 calcar of *Desmodus rotundus* (Phyllostomidae) also exhibits bony tissue (Fig. 4g).

289 Histological sections also confirmed the presence of a synovial joint between the calcar  
290 and the calcaneus in several bat species (Fig. 4e, f, g; Appendix S1) and the presence of a  
291 relatively small, uncalcified, cartilaginous calcar in one species in which the calcar was thought  
292 to be absent (*Rhinopoma hardwickii*, Rhinopomatidae; Fig. 4h). Our anatomical analyses also  
293 highlighted known shape differences across bat calcars; although most calcars take the form of a  
294 rod with an approximately elliptical cross-section, some exhibit notably divergent shapes. For  
295 example, a cartilaginous hook-like “keel” structure protrudes from the main shaft of the calcar in  
296 some species, including *Eptesicus fuscus*, *Myotis californicus* (both Vespertilionidae), and  
297 *Thyroptera tricolor* (Thyropteridae). The bony portion of the calcar of *Noctilio leporinus*

298 exhibits an antero-posteriorly flattened cross-section with multiple cavities in the bony tissue  
299 (Fig. 4b). We describe, for the first time, that the calcar of *Mystacina tuberculata* (Mystacinidae)  
300 has two distinct calcified tines (Fig. 3e, f), a unique morphology among the calcars in our  
301 sample.

302         The diceCT scans and dissections of pteropodid feet revealed calcar anatomical diversity  
303 within the Pteropodidae. The diceCT scan of *Cynopterus brachyotis* indicates that the calcar and  
304 the tendon of the gastrocnemius muscle make two separate, distinct insertions on the calcaneal  
305 tuberosity. We confirmed this observation through a dissection in which we were able to cleanly  
306 pass a pin between the insertions of the calcar and the tendon on the calcaneus (Fig. 5). However,  
307 dissections of the calcars of *Rousettus aegyptiacus* and *Pteropus* sp. indicated that the calcar  
308 tissue is contiguous with the tendon of the gastrocnemius muscle. DiceCT scans of these species  
309 were inconclusive, as iodine solution only slightly increases CT scan image contrast in cartilage.  
310 More detailed anatomical descriptions of each species examined with  $\mu$ CT scanning and  
311 histological sectioning are provided in Appendix S1.

312

## 313 **DISCUSSION**

314         The bat calcar is a skeletal novelty that has anatomically diversified widely throughout  
315 Chiroptera. This diversification appears to have occurred early in chiropteran history, as  
316 evidenced by support for an early burst model of calcar length evolution and the corresponding  
317 negative morphological disparity indices. This is consistent with evidence for early  
318 diversification of bats in the fossil record and an overall declining rate of speciation in  
319 Chiroptera (Shi and Rabosky 2015). Eocene bat postcrania are best preserved in the Green River  
320 Formation and the famous Messel Lagerstätten near Messel, Germany. Although *Onychonycteris*

321 *finneyi* is known to have had a calcar, no calcars have been found in postcranial fossils of  
322 *Icaronycteris index*, a later Green River bat with limb proportions typical of some extant bats.  
323 Among the Messel bats, *Hassianycteris*, *Palaeochiropteryx*, and *Tachypteron* had calcars, but no  
324 calcars have been reported in specimens of *Archaeonycteris* (Simmons and Geisler 1998, Storch  
325 et al. 2002). Additionally, no evidence of an articulation facet has been found on the calcanei of  
326 *Icaronycteris* and *Archaeonycteris* (Simmons and Geisler 1998). Because calcars vary in amount  
327 of calcification, it is possible that uncalcified cartilage calcars were not preserved in these taxa;  
328 nonetheless, it is clear that Eocene bats exhibited diversity in either the presence of a calcar or in  
329 the amount of calcar calcification soon after the first bats evolved flight.

330 We found weaker support for the EB model when only non-pteropodid calcars were  
331 included in the analyses. However, our pteropodid diceCT scan and dissection results call into  
332 question the proposition that the pteropodid calcar is not homologous to the calcar of other bats.  
333 We have demonstrated that the calcar morphology of at least one pteropodid individual  
334 (*Cynopterus brachyotis*) differs from the calcar morphology of other pteropodids; its relation to  
335 the surrounding connective tissue makes it more similar to the “microbat” calcar condition. This  
336 intermediate anatomical condition in *C. brachyotis* suggests that it is more appropriate to  
337 consider the calcars of all bats in macroevolutionary analyses, rather than just those of the  
338 paraphyletic “microchiroptera.”

339 Support for the EB model of morphological evolution is notoriously low in the  
340 macroevolution literature (Harmon et al. 2010). It has been proposed that this could be an  
341 artefact of either hypothesis testing at too low of a taxonomic level, such that the signal of the  
342 “early burst” of the higher-level clade has been lost, or a consequence of testing variables that  
343 are not functionally-linked to the specific radiation, such as body mass and overall shape (Slater

344 and Friscia, 2018). The evolution of wings in the early Chiroptera is a type of extensive  
345 morphological change that would be expected to precede a burst of diversification, as flight  
346 would allow access to an entirely new ecospace (other examples summarized in Erwin 2015).  
347 The calcar abruptly appeared in the fossil record as part of this wing structure and is now found  
348 in the vast majority of bats. When we tested an early burst hypothesis of calcar evolution across  
349 all of Chiroptera, we found that the calcar—a distinct synapomorphy associated with an aerial  
350 ecological mode—retains the signal of an early diversification burst. The true key innovation,  
351 however, is likely the full wing apparatus, which not only includes the novel calcar but also the  
352 elongation of the forelimb bones and the evolution of novel and developmentally-retained wing  
353 membranes. The functional relevance of the calcar within the wing is untested, although it is  
354 generally assumed that the calcar plays a role in supporting the hindlimb membrane during flight  
355 (Vaughan 1970).

356         Across extant bats, the calcar exhibits interspecific diversity in anatomical parameters  
357 that are likely to affect function, both in terms of overall structure (e.g., length and shape) and  
358 material (histological) composition. Although others have noted differences in the amount of  
359 calcar calcification among species based on dissection observations and clearing and staining  
360 procedures (Schutt and Simmons 1998, Koyabu and Son 2014, Reyes-Amaya et al. 2017), this is  
361 the first study to confirm the presence of ossified tissue in the bat calcar. Given that there is  
362 extensive variation in material properties between cartilage, calcified cartilage, and bone (Currey  
363 2002), interspecific variation in calcar tissue composition, length, and/or shape would result in  
364 interspecific differences in responses to applied loading (e.g., muscular contraction or resistance  
365 of a stretched membrane). Bat hindlimbs play important functional roles in prey capture (Fish et  
366 al. 1991), roosting (Simmons and Quinn 1994), and possibly flight (Cheney et al. 2014). The



367 anatomical variation described here suggests calcar function may vary across species with  
368 different ecologies that are subject to different functional evolutionary pressures. For instance, in  
369 *Myotis*, long calcars were found to be associated with a trawling foraging strategy (Fenton and  
370 Bogdanowicz 2002). Additionally, the presence of a synovial joint between the calcar and the  
371 calcaneus, in combination with the presence of skeletal muscles that insert on the calcar (Schutt  
372 and Simmons 1999, Glass and Gannon 1994, Stanchak and Santana 2018), suggests a kinematic  
373 functional role for the calcar. Although there are reported observations of moving calcars (e.g., in  
374 *Noctilio leporinus* as they trawl bodies of water for fish prey; Vaughan 1970, Altenbach 1989),  
375 calcar motion has not yet been confirmed with a rigorous kinematic analysis in any bat species.  
376 Further detailed, quantitative analyses of calcar biomechanics, including material testing and  
377 behavioral experiments, are required to estimate the magnitude of the effect of anatomical  
378 variation on any potential calcar function.

379         The origin of the calcar is still a mystery. It meets Hall's (2015) definition of neomorphs,  
380 which "*seem to appear out of nowhere, de novo*, but are present in most if not all individuals of a  
381 species" as well as Müller and Wagner's (1999) definition of a morphological novelty as "neither  
382 homologous to any structure in the species nor homonomous to any other structure of the same  
383 organism." Although the immediate ancestry of the chiropteran lineage is unknown (Halliday et  
384 al. 2017), no calcar-like structure is found in earlier eutherian mammals. However, the discovery  
385 of a calcar in a Mesozoic mammaliaform (Meng et al. 2017) raises the possibility of a deep  
386 homological explanation for the origin of calcar (Shubin et al. 2009).

387         One proximate hypothesis for the origin of the calcar is that it initially develops within  
388 existing connective tissue in the hindlimb membrane via a process of metaplasia (Carter and  
389 Beaupré 2007). The condition of the pteropodid calcar, as described here, may provide

390 incremental support for this hypothesis. Connective tissue (cartilage, tendon, and even bone) is  
391 both plastic and labile (Hall 2015). The calcar may have arisen in a mass of connective tissue in  
392 close proximity to the calcaneus, perhaps as that mass of tissue was placed under stress during  
393 the development of the hindlimb membrane. Consequently, differences among species in the  
394 association of the calcar with the calcaneus may be the result of relatively minor developmental  
395 alterations. Our finding of many sesamoids in bat feet, consistent with a recent assessment of bat  
396 sesamoids (Amador et al. 2018), suggests a propensity for metaplastic cartilage and bone  
397 development in bat feet, as tendon metaplasia is hypothesized to play a role in sesamoid  
398 development (Sarin et al. 2002; but see also Eyal et al. 2015, 2018). Developmental plasticity  
399 may also lead to intraspecific variation in calcar anatomy or even presence. This might be a  
400 fruitful path of further study in light of our finding of a small, calcar-like structure in the foot of  
401 one specimen of *Rhinopoma hardwickii*.

402 Anatomical structures of ambiguous homology are under-explored in studies of  
403 morphological evolution. The bat calcar is an anatomically diverse skeletal novelty found in a  
404 vast majority of species of a highly diverse clade of vertebrates. It evolved into a potentially  
405 functionally-important part of the bat wing, morphologically diversifying during the early  
406 radiation of bats. Additional, focused studies of the bat calcar—especially of its function and  
407 development—have a high potential to yield new knowledge of skeletal biology and a better  
408 understanding of the mechanisms through which the skeleton evolves into novel forms.

409

410

411

412

413 **TABLES**

414 Table 1. Results from evolutionary model comparisons. Calcar/Tibia and Calcar/Forearm  
415 indicate models considering ratios of calcar length to tibia and forearm length, respectively;  
416 Calcar~Tibia and Calcar~Forearm indicate models using residuals of phylogenetic regressions of  
417 the same variables. BM = Brownian motion model; EB = Early Burst model;  $\alpha$ ,  $\sigma^2$ , and  $z_0$  are the  
418 fit parameters of those models corresponding to the names used in the “fitContinuous” function  
419 (see Material and Methods);  $w_{AICc}$  = AIC<sub>c</sub> weights. All OU models collapsed to BM models, so  
420 only BM and EB results are shown. Bold text emphasizes models with  $w_{AICc} > 0.99$ .

421

422

423

424

425

426

427

428

429

430

431

432

433

434

435

|                                 | Model     | $\sigma^2$    | z0             | a              | $W_{AICc}$       | $\Delta AIC_c$ |
|---------------------------------|-----------|---------------|----------------|----------------|------------------|----------------|
| <b>Calcar/Tibia</b>             |           |               |                |                |                  |                |
| all data                        | BM        | 0.0011        | 0.7073         | --             | <0.001           | 23.579         |
|                                 | <b>EB</b> | <b>0.0056</b> | <b>0.6872</b>  | <b>-0.0434</b> | <b>&gt;0.999</b> | <b>0</b>       |
| no zero lengths                 | BM        | 0.0010        | 0.7568         | --             | <0.001           | 16.167         |
|                                 | <b>EB</b> | <b>0.0041</b> | <b>0.7524</b>  | <b>-0.0374</b> | <b>&gt;0.999</b> | <b>0</b>       |
| no zero lengths or Pteropodidae | BM        | 0.0010        | 0.8348         | --             | 0.0477           | 5.952          |
|                                 | EB        | 0.0034        | 0.8313         | -0.0299        | 0.9353           | 0              |
| <b>Calcar/Forearm</b>           |           |               |                |                |                  |                |
| all data                        | BM        | 0.0002        | 0.2854         | --             | <0.001           | 22.207         |
|                                 | <b>EB</b> | <b>0.0008</b> | <b>0.2787</b>  | <b>-0.0416</b> | <b>&gt;0.999</b> | <b>0</b>       |
| no zero lengths                 | BM        | 0.0001        | 0.3055         | --             | 0.0009           | 13.962         |
|                                 | <b>EB</b> | <b>0.0005</b> | <b>0.3053</b>  | <b>-0.0345</b> | <b>0.9987</b>    | <b>0</b>       |
| no zero lengths or Pteropodidae | BM        | 0.0002        | 0.3373         | --             | 0.1415           | 3.485          |
|                                 | EB        | 0.0004        | 0.3374         | -0.0252        | 0.8081           | 0              |
| <b>Calcar ~ Tibia</b>           |           |               |                |                |                  |                |
| all data                        | BM        | 0.4344        | 0.0            | --             | <0.001           | 20.036         |
|                                 | <b>EB</b> | <b>2.1063</b> | <b>-0.3221</b> | <b>-0.0412</b> | <b>&gt;0.999</b> | <b>0</b>       |
| no zero lengths                 | BM        | 0.3899        | 0.0            | --             | 0.0007           | 14.395         |
|                                 | <b>EB</b> | <b>1.6065</b> | <b>-0.0694</b> | <b>-0.0365</b> | <b>0.9990</b>    | <b>0</b>       |
| no zero lengths or Pteropodidae | BM        | 0.3491        | 0.0            | --             | 0.1577           | 3.212          |
|                                 | EB        | 0.8923        | -0.0675        | -0.0234        | 0.7861           | 0              |
| <b>Calcar ~ Forearm</b>         |           |               |                |                |                  |                |
| all data                        | BM        | 0.4489        | 0.0            | --             | <0.001           | 16.869         |
|                                 | <b>EB</b> | <b>1.9658</b> | <b>-0.2503</b> | <b>-0.0383</b> | <b>&gt;0.999</b> | <b>0</b>       |
| no zero lengths                 | BM        | 0.4092        | 0.0            | --             | 0.0038           | 11.149         |
|                                 | <b>EB</b> | <b>1.4769</b> | <b>-0.0112</b> | <b>-0.0328</b> | <b>0.9949</b>    | <b>0</b>       |
| no zero lengths or Pteropodidae | BM        | 0.3763        | 0.0            | --             | 0.3999           | 0.270          |
|                                 | EB        | 0.7381        | 0.0004         | -0.0165        | 0.4577           | 0              |

436

437

438 Table 2. Results from disparity-through-time analyses. MDI = morphological disparity index;  
439 BM = Brownian motion model; EB = Early Burst model.

|                                 | MDI (BM)           | MDI (EB)            |
|---------------------------------|--------------------|---------------------|
| Calcar/Tibia                    |                    |                     |
| all data                        | -0.284 (p < 0.001) | -0.105 (p = 0.034)  |
| no zero lengths                 | -0.275 (p < 0.001) | -0.119 (p = 0.036)  |
| no zero lengths or Pteropodidae | -0.236 (p = 0.002) | -0.112 (p = 0.063)  |
| Calcar/Forearm                  |                    |                     |
| all data                        | -0.287 (p < 0.001) | -0.113 (p = 0.023)  |
| no zero lengths                 | -0.278 (p < 0.001) | -0.125 (p = 0.013)  |
| no zero lengths or Pteropodidae | -0.223 (p = 0.001) | -0.113 (p = 0.065)  |
| Calcar ~ Tibia                  |                    |                     |
| all data                        | -0.223 (p < 0.001) | -0.056 (p = 0.182)  |
| no zero lengths                 | -0.221 (p = 0.001) | -0.066 (p = 0.161)  |
| no zero lengths or Pteropodidae | -0.195 (p = 0.003) | -0.0898 (p = 0.108) |
| Calcar ~ Forearm                |                    |                     |
| all data                        | -0.222 (p = 0.001) | -0.055 (p = 0.195)  |
| no zero lengths                 | -0.207 (p = 0.004) | -0.0752 (p = 0.128) |
| no zero lengths or Pteropodidae | -0.17 (p = 0.027)  | -0.0931 (p = 0.129) |

440

441

442

443

444

445

446

447

448

449 **FIGURES**

450 Figure 1. Neomorphic skeletal rods have evolved multiple times in vertebrates with gliding or  
451 flying membranes. These structures are indicated in pink in the schematic drawing. Drawings  
452 based on Xu et al. 2015, Meng et al. 2017, Bennett 2007, Witton 2013, Coster et al. 2015,  
453 Kawashima et al. 2017, Johnson-Murray 1987, Jackson 2012.

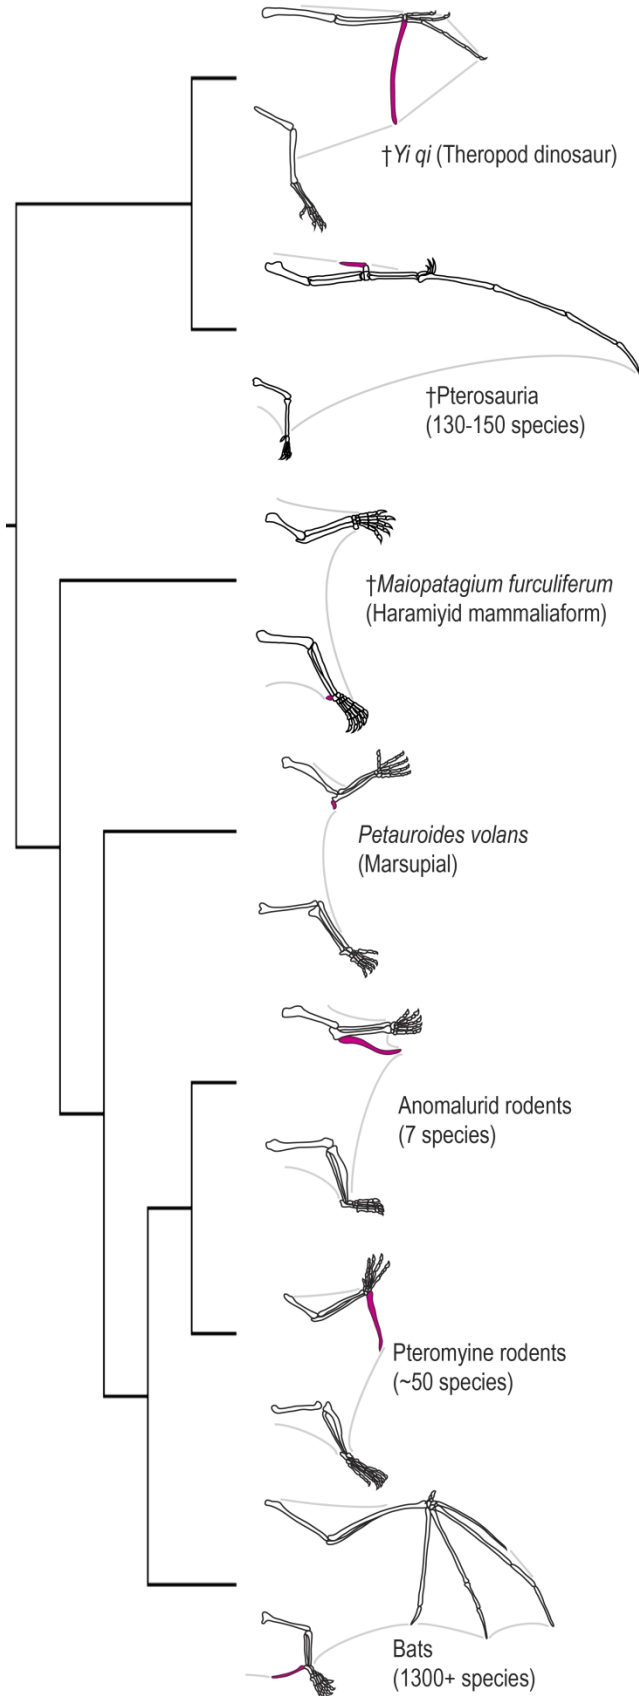

455 Figure 2. Relative calcar length varies extensively and diversified early in bat evolutionary  
456 history. Ratio of calcar length-to-tibia length is plotted on a phylogeny of Chiroptera. Gray lines  
457 around the phylogenetic tree designate bat families; species-rich families are labeled. Schematic  
458 drawing on the color scale illustrate representative hindlimb morphologies for different calcar  
459 lengths. In the diversity-through-time plot of mean subclade disparity, the black line indicates the  
460 mean subclade disparity through time for the measured calcar-to-tibia length ratios, the dotted  
461 line to 1,000 Brownian motion simulations, and the gray band a 95% confidence range for the  
462 simulations.

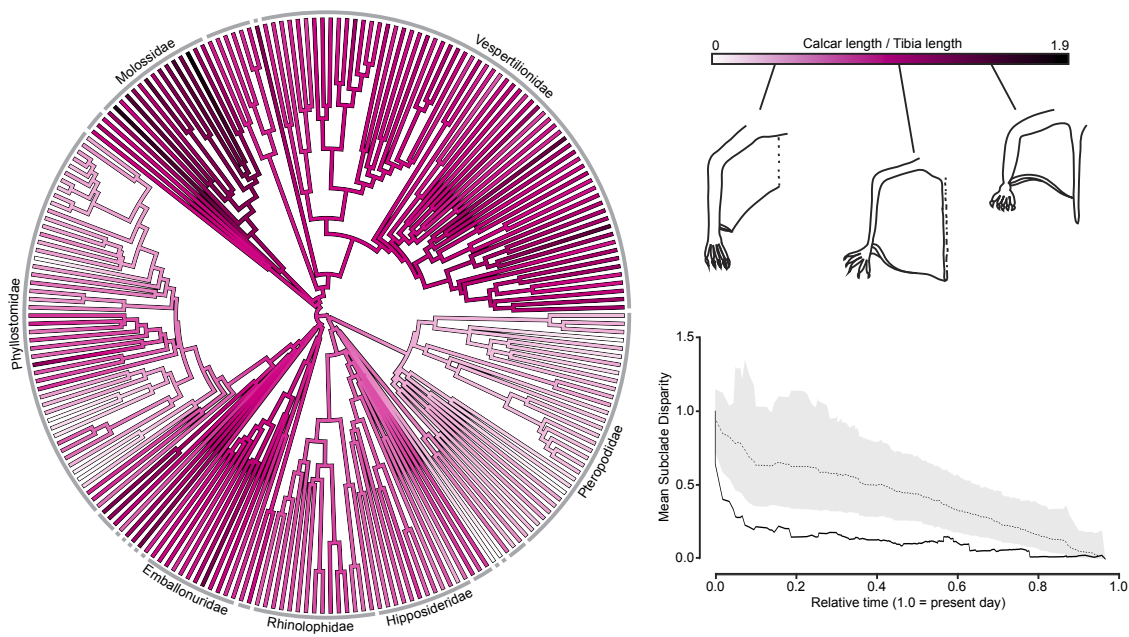

463

464

465

466

467



468 Figure 3. Bat ankle morphologies as demonstrated by rendered  $\mu$ CT scans. (a) Ankle of  
469 *Balantiopteryx plicata*, demonstrating calcar-calcaneus articulation (in pink-yellow), the other  
470 typical mammalian tarsals (in addition to the calcaneus; in shades of gray), and an additional  
471 sesamoid (in green). Inset demonstrates the ankle position relative to the full leg. Other bat feet  
472  $\mu$ CT scans pictured are (b) *Noctilio leporinus*, (c) *Desmodus rotundus*, (d) *Rhinolophus affinis*  
473 (AMNH 234034; calcar not visible due to lack of calcification), (e and f) *Mystacina tuberculata*  
474 (MVZ 173918). All are pictured in plantar view except (f), which is medial to show calcified  
475 tines on calcar.

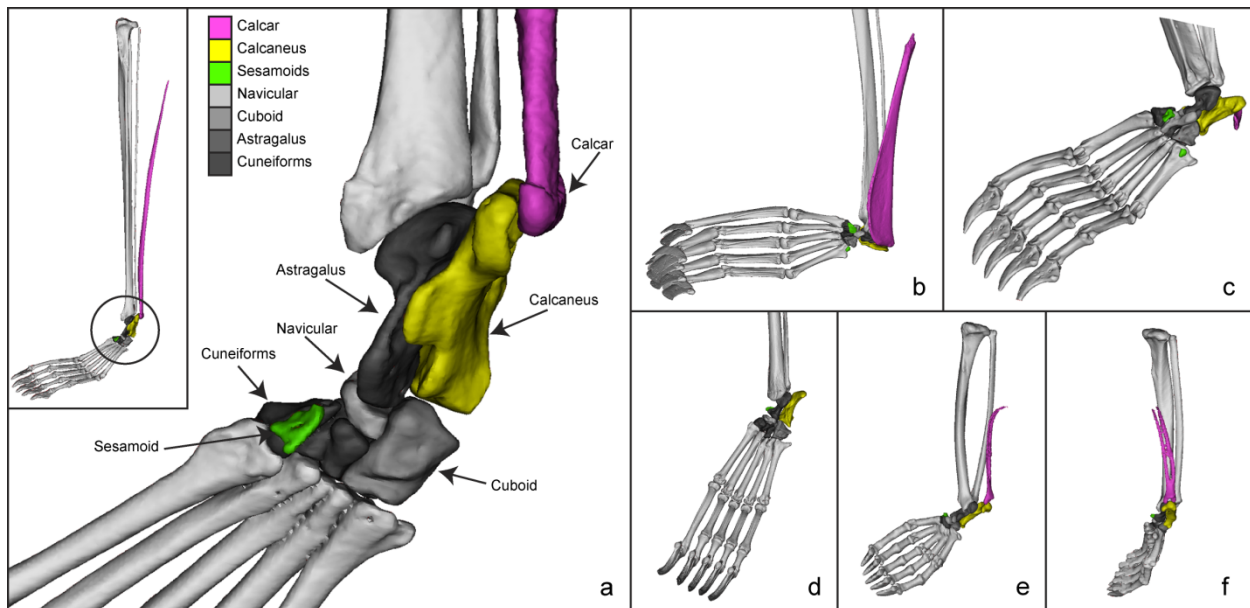

484 Figure 4. Histological diversity in the bat calcar. (a) Slice of  $\mu$ CT scan through the longitudinal  
485 axis of the calcar of *Noctilio leporinus*. (b) Axial  $\mu$ CT scan slice through the hindlimb of *N.*  
486 *leporinus*, demonstrating cross-sectional shapes of the calcar and leg bones. (c) Mallory-stained  
487 histological section through the ankle of *N. leporinus*, demonstrating bony calcar tissue and a  
488 ligamentous connection between the calcar and calcaneus. (d) Slice of  $\mu$ CT scan and (e) fast  
489 green/safranin O-stained histological section through the longitudinal axis of the calcar of  
490 *Molossus molossus*, demonstrating bony tissue in the calcar near the synovial joint with the  
491 calcaneus, which then transitions distally to calcified cartilage. (f) Fast green/safranin O-stained  
492 histological section of *Eptesicus fuscus*, showing a fully-cartilaginous calcar and a synovial joint  
493 between the calcaneus and the calcar. (g) Mallory-stained histological section of *Desmodus*  
494 *rotundus*, demonstrating bony nodule of calcar near the synovial articulation with the calcaneus.  
495 (h) Mallory-stained histological section demonstrating calcar presence in *Rhinopoma hardwickii*  
496 (FMNH 123185). Ca = calcar, Cs = calcaneus, Fi = fibula, Ti = tibia. In all sections the scale bar  
497 indicates 100 $\mu$ m, except for (b) and (b) where it is 500 $\mu$ m.

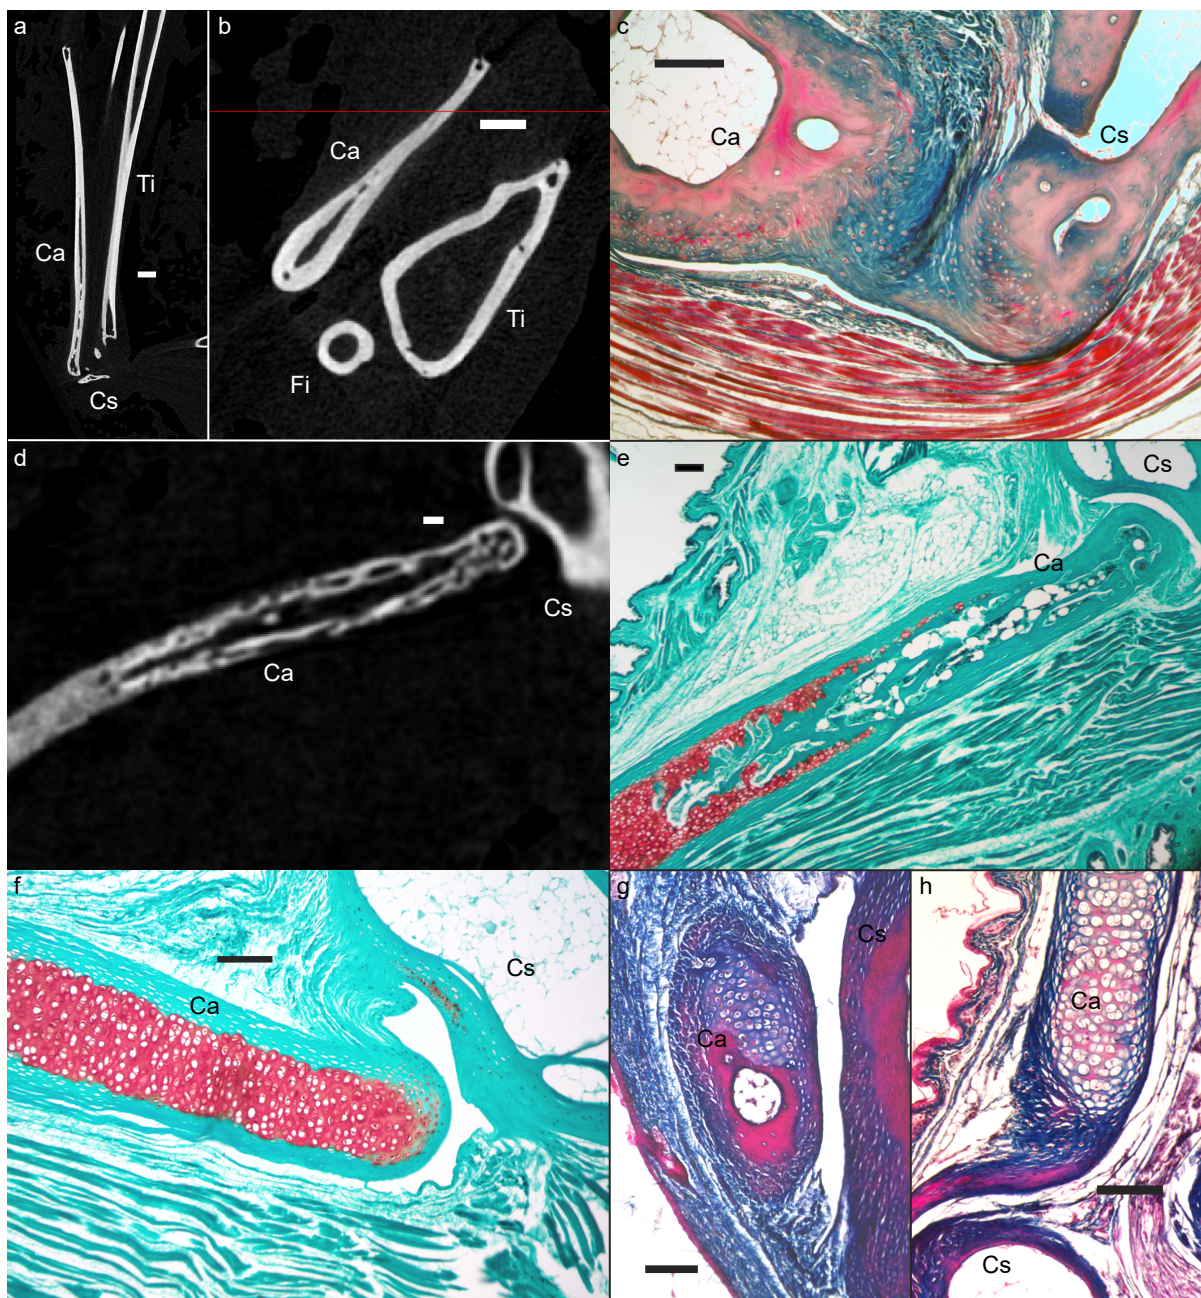

498

499

500 Figure 5. Photographs of dissection of the *Cynopterus brachyotis* ankle, demonstrating  
501 separation between the calcar and the tendon of the gastrocnemius muscle. (a) – (c) are  
502 dissection photos of an iodine-stained specimen. (b) pin demonstrates the separation between the  
503 calcar and the tendon. (c) shows the insertion of the calcar on the calcaneal tuberosity after the  
504 tendon has been dissected out. (d) is a slice of the diceCT scan demonstrating the separation  
505 between the calcar and the tendon and their two distinct insertions on the calcaneus. Ca = calcar,  
506 Cs = calcaneus, tm = tendon of the gastrocnemius muscle.

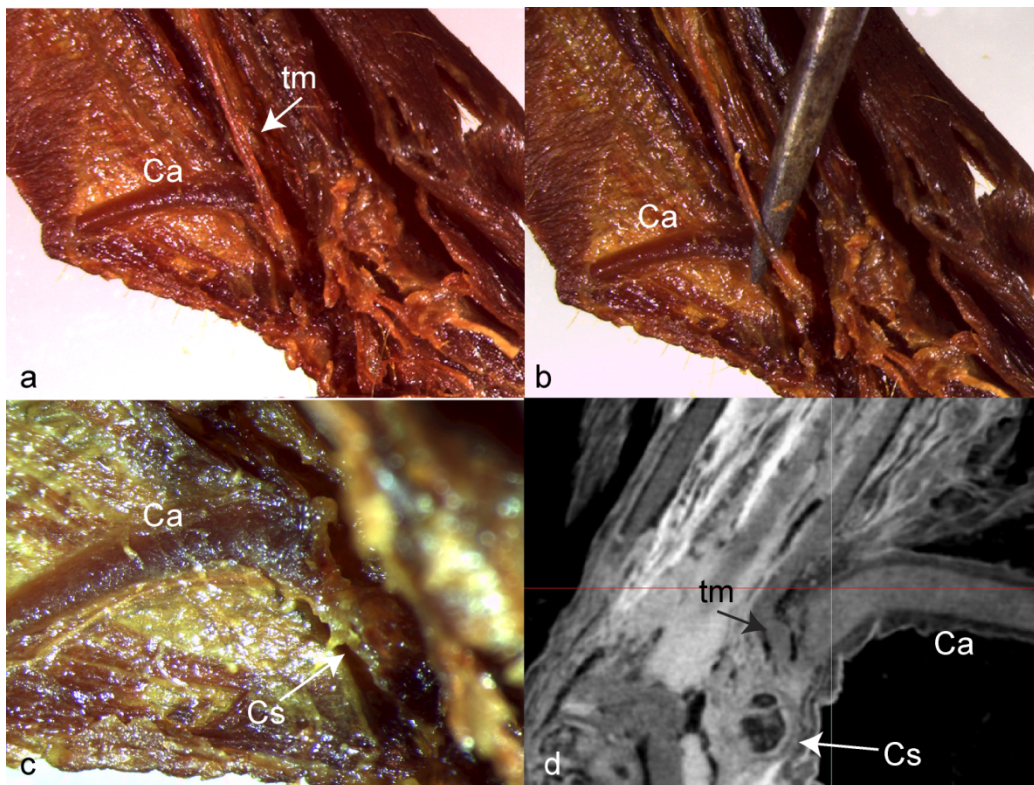

507  
508  
509  
510  
511  
512

513 **REFERENCES**

- 514 Adams, R.A. and Thibault, K.M. 1999. Growth, development, and histology of the calcar in the  
515 little brown bat, *Myotis lucifugus* (Vespertilionidae). *Acta chiropterologica* 1:215-221.
- 516 Altenbach, J.S.1989. Prey capture by the fishing bats *Noctilio leporinus* and *Myotis vivesi*.  
517 *Journal of Mammalogy* 70:421-424.
- 518 Amador, L.I., Giannini, N.P., Simmons, N.B. and Abdala, V., 2018. Morphology and evolution  
519 of sesamoid elements in bats (Mammalia: Chiroptera). *American Museum Novitates*, 3905:1-  
520 40.
- 521 Bennett, S.C., 2007. Articulation and function of the pteroid bone of pterosaurs. *Journal of*  
522 *Vertebrate Paleontology*, 27:881-891.
- 523 Blomberg, S.P., Garland Jr., T., and Ives, A.R. 2003. Testing for phylogenetic signal in  
524 comparative data: Behavioral traits are more labile. *Evolution* 57:717-745.
- 525 Butler M.A. and King, A.A. 2004. Phylogenetic comparative analysis: a modeling approach for  
526 adaptive evolution. *American Naturalist* 164:683-695.
- 527 Carter, D.R., and Beaupré, G S. 2007. *Skeletal function and form: mechanobiology of skeletal*  
528 *development, aging, and regeneration*. Cambridge Univ. Press.
- 529 Cheney, J.A. *et al.* 2014. Hindlimb motion during steady flight of the lesser dog-faced fruit bat,  
530 *Cynopterus brachyotis*. *Plos one* 9, e98093.
- 531 Coster, P., Beard, K.C., Salem, M.J., Chaimanee, Y. and Jaeger, J.J., 2015. New fossils from the  
532 Paleogene of central Libya illuminate the evolutionary history of endemic African  
533 anomaluroid rodents. *Frontiers in Earth Science*, 3:56.
- 534 Currey, J.D. 2002. *Bones: structure and mechanics*. Princeton Univ. Press.
- 535

- 536 Czech, N.U., Klauer, G., Dehnhardt, G., and Siemers, B.M. 2008. Fringe for foraging? Histology  
537 of the bristle-like hairs on the tail membrane of the gleaning bat, *Myotis nattereri*. *Acta*  
538 *chiropterologica* 10:303-311.
- 539 Eyal, S., Blitz, E., Shwartz, Y., Akiyama, H., Schweitzer, R. and Zelzer, E., 2015. On the  
540 development of the patella. *Development*, 142:1831-1839.
- 541 Eyal, S., Rubin, S., Krief, S., Levin, L. and Zelzer, E., 2018. On the Development of Sesamoid  
542 Bones. *bioRxiv*, doi: <https://doi.org/10.1101/316901>.
- 543 Felsenstein J. 1973. Maximum likelihood estimation of evolutionary trees from continuous  
544 characters. *American Journal of Human Genetics* 25:471-492.
- 545 Felsenstein, J. 1985. Phylogenies and the comparative method. *American Naturalist* 125:1-15.
- 546 Fenton, M.B. and Bogdanowicz, W. 2002. Relationships between external morphology and  
547 foraging behavior: bats in the genus *Myotis*. *Canadian Journal of Zoology*, 80, 1004-1013.
- 548 Fenton, M.B. and Simmons, N.B. 2015. *Bats: A World of Science and Mystery*. Univ. of Chicago  
549 Press.
- 550 Fish, F. E., Blood, B. R., and Clark, B. D. 1991. Hydrodynamics of the feet of fish-catching bats:  
551 Influence of the water surface on drag and morphological design. *Journal of Experimental*  
552 *Zoology* 258:164-173.
- 553 Gignac, P.M., *et al.* 2006. Diffusible iodine-based contrast-enhanced computed tomography  
554 (diceCT): an emerging tool for rapid, high-resolution, 3-D imaging of metazoan soft tissues.  
555 *Journal of anatomy* 228:889-909.
- 556 Glass, P.J. and Gannon, W.L. 1994. Description of *M. uropataginalis* (a new muscles), with  
557 additional comments from a microscopy study of the uropatagium of the fringed myotis  
558 (*Myotis thysanodes*). *Canadian Journal of Zoology* 72:1752-1754.

- 559 Hall, B.K. 2015. *Bones and Cartilage*. Academic Press.
- 560 Halliday, T.J.D., Upchurch, P., Goswami, A. 2017. Resolving the relationships of Paleocene  
561 placental mammals. *Biological Reviews* 92:521-550.
- 562 Hand, S.J., Sigé, B., Archer, M., Gunnell, G.F., and Simmons, N.B. 2015. A New Early Eocene  
563 (Ypresian) Bat from Pourcy, Paris Basin, France, with Comments on Patterns of Diversity in  
564 the Earliest Chiropterans. *Journal of Mammalian Evolution* 22:343-354.
- 565 Hansen, T.F. 1997. Stabilizing selection and the comparative analysis of  
566 adaptation. *Evolution*, 51:1341-1351.
- 567 Harmon, L.J., Schulte, J.A., Losos, J.B., and Larson, A. 2003. Tempo and mode of evolutionary  
568 radiation in iguana lizards. *Science* 301:961-964.
- 569 Harmon, L.J., Weir, J.T., Brock, C.D., Glor, R.E., and Challenger, W. 2007. GEIGER:  
570 investigating evolutionary radiations. *Bioinformatics* 24:129-131.
- 571 Harmon L.J. et al. 2010. Early bursts of body size and shape evolution are rare in comparative  
572 data. *Evolution* 64:2385-2396.
- 573 Hibbeler, R.C. 2007. *Mechanics of Materials*. Prentice Hall.
- 574 Humason, G.L. 1962. *Animal Tissue Techniques*. W.H. Freeman and Co.
- 575 Erwin, D.H., 2015. Novelty and innovation in the history of life. *Current Biology*, 25:R930-  
576 R940.
- 577 Jackson, S.M., 2012. *Gliding mammals of the world*. CSIRO Publishing.
- 578 Johnson-Murray, J. L. (1987). The comparative myology of the gliding membranes of Acrobatidae,  
579 Petauroidea and Petaurus contrasted with the cutaneous myology of Hemibelideus and  
580 Pseudocheirus (Marsupialia, Phalangeridae) and with selected gliding rodentia (Sciuridae and  
581 Anamoluridae). *Australian Journal of Zoology*, 35:101-113.

- 582 Kawashima, T., Thorington Jr, R.W., Bohaska, P.W. and Sato, F., 2017. Evolutionary  
583 Transformation of the Palmaris Longus Muscle in Flying Squirrels (Pteromyini: Sciuridae):  
584 An Anatomical Consideration of the Origin of the Uniquely Specialized Styliform  
585 Cartilage. *The Anatomical Record*, 300:340-352.
- 586 Kobayashi, M. 2017. Homology of the muscles within the uropatagium membrane in  
587 Leschenault's rousette (*Rousettus leschenaultii*). *Mammalian Biology-Zeitschrift für*  
588 *Säugetierkunde*, 86:102-106.
- 589 Koyabu, D., and Son, N. T. 2014. Patterns of postcranial ossification and sequence heterochrony  
590 in bats: Life histories and developmental trade-offs. *Journal of Experimental Zoology Part B:*  
591 *Molecular and Developmental Evolution* 322:607-618.
- 592 Kunz, T.H. and Fenton, M.B., eds. 2005. *Bat Ecology*. Univ. of Chicago Press.
- 593 López-Fernández, H., Arbour, J.H., Winemiller, K.O. and Honeycutt, R.L., 2013. Testing for  
594 ancient adaptive radiations in Neotropical cichlid fishes. *Evolution*, 67:1321-1337.
- 595 Meng, Q.J., Grossnickle, D.M., Liu, D., Zhang, Y.G., Neander, A.I., Ji, Q. and Luo, Z.X., 2017.  
596 New gliding mammaliaforms from the Jurassic. *Nature*, 548:291.
- 597 Müller, G.B. and Wagner, G.P. 1991. Novelty in evolution: restructuring the concept. *Annual*  
598 *review of ecology and systematics* 22:229-256 (1991).
- 599 Pennell, M.W., *et al.* 2014. geiger v2.0: an expanded suite of methods for fitting macroevolution  
600 models to phylogenetic trees. *Bioinformatics* 30:2216-2218.
- 601 R Core Team. 2017. R: A language and environment for statistical computing.
- 602 Revell, L. J. 2009. Size-correction and principal components for interspecific comparative  
603 studies. *Evolution*, 63:3258-3268.



- 604 Revell, L. J. 2010. Phylogenetic signal and linear regression on species data. *Methods in Ecology*  
605 *and Evolution*, 1:319-329.
- 606 Revell, L.J. 2012. phytools: An R package for phylogenetic comparative biology (and other  
607 things). *Methods in Ecology and Evolution* 3:217-223.
- 608 Revell, L.J. 2013. Two new graphical methods for mapping trait evolution on phylogenies.  
609 *Methods in Ecology and Evolution* 4:754-759.
- 610 Reyes-Amaya, N., Jerez, A., and Flores, D. 2017. Morphology and Postnatal Development of  
611 Lower Hindlimbs in *Desmodus rotundus* (Chiroptera: Phyllostomidae): A Comparative  
612 Study. *The Anatomical Record* 300:2150-2165.
- 613 Sarin, V.K., Erickson, G.M., Giori, N.J., Bergman, A.G. and Carter, D.R., 1999. Coincident  
614 development of sesamoid bones and clues to their evolution. *The Anatomical Record*.  
615 257:174-180.
- 616 Schutt, W.A. and Simmons, N.B., 1998. Morphology and homology of the chiropteran calcar,  
617 with comments on the phylogenetic relationships of *Archaeopterus*. *Journal of*  
618 *Mammalian Evolution*, 5:1-32.
- 619 Shi, J.J. and Rabosky, D.L. 2015. Speciation dynamics during the global radiation of extant bats.  
620 *Evolution* 69:1528-1545.
- 621 Shubin, N., Tabin, C., and Carroll, S. 2009. Deep homology and the origins of evolutionary  
622 novelty. *Nature* 457:818-823.
- 623 Simmons, N.B. Order Chiroptera. 2005. *Mammal Species of the World: A Taxonomic and*  
624 *Geographic Reference*. 312-529. Johns Hopkins Univ. Press.
- 625 Simmons, N.B., Seymour, K.L., Habersetzer, J., and Gunnell, G.F. 2008. Primitive Early Eocene  
626 bat from Wyoming and the evolution of flight and echolocation. *Nature* 451:818-821.

- 627 Simmons, N.B. and Geisler, J.H., 1998. Phylogenetic relationships of Icaronycteris,  
628 Archaeonycteris, Hassianycteris, and Palaeochiropteryx to extant bat lineages, with  
629 comments on the evolution of echolocation and foraging strategies in Microchiroptera.  
630 Bulletin of the AMNH, 235.
- 631 Simmons, N.B. and Quinn, T.H. 1994. Evolution of the digital tendon locking mechanism in bats  
632 and dermopterans: a phylogenetic perspective. *Journal of Mammalian Evolution* 2:231-254.
- 633 Slater, G.J., Price, S.A., Santini, F., and Alfaro, M.A. 2010. Diversity vs disparity and the  
634 evolution of modern cetaceans. *Proceedings of the Royal Society B* 277:3097-3104.
- 635 Slater, G.J. and Pennell, M.W., 2013. Robust regression and posterior predictive simulation  
636 increase power to detect early bursts of trait evolution. *Systematic Biology*, 63:293-308.
- 637 Slater, G.J. and Friscia, A.R., 2018. Hierarchy, Morphology, and Adaptive Radiation: a Test of  
638 Osborn's Law in the Carnivora. *bioRxiv*, doi: <https://doi.org/10.1101/285700>.
- 639 Smith, T., Habersetzer, J., Simmons, N.B., and Gunnell, G.F. 2012. Systematics and  
640 paleobiogeography of early bats. *Evolutionary History of Bats: Fossils, Molecules and*  
641 *Morphology*. 23-66. Cambridge, Univ. Press.
- 642 Stanchak, K.E. and Santana, S.E. 2018. Assessment of the hindlimb membrane musculature of  
643 bats: Implications for active control of the calcar. *The Anatomical Record* 301, 441-448.
- 644 Storch, G., Sigé, B. and Habersetzer, J., 2002. *Tachypteron franzeni* n. gen., n. sp., earliest  
645 emballonurid bat from the Middle Eocene of Messel (Mammalia,  
646 Chiroptera). *Paläontologische Zeitschrift*, 76:189-199.
- 647 Teeling, E.C., *et al.* 2005. A molecular phylogeny for bats illuminates biogeography and the  
648 fossil record. *Science* 307:580-584.
- 649 Vaughan, T.A., 1970. The skeletal system. *Biology of bats* v1, 98-139. Academic Press, NY.

650 Witton, M.P., 2013. *Pterosaurs: natural history, evolution, anatomy*. Princeton University Press.

651 Xu, X., Zheng, X., Sullivan, C., Wang, X., Xing, L., Wang, Y., Zhang, X., O'Connor, J.K.,

652 Zhang, F. and Pan, Y., 2015. A bizarre Jurassic maniraptoran theropod with preserved

653 evidence of membranous wings. *Nature*, 521:70.

654
